# Supplementary material for: The Potential Role of Human NME1 in Neuronal Differentiation of Porcine Mesenchymal Stem Cells: Application of NB-hNME1 as a Human NME1 Suppressor
Source: Int J Mol Sci. 2021 Nov 11;22(22):12194. doi: 10.3390/ijms222212194 (PMC8619003; doi:10.3390/ijms222212194)
Supplement: Supplementary file 1 [file ijms-22-12194-s001.zip › ijms-1433365-supplementary.pdf]

## Article

# The Potential Role of Human NME1 in Neuronal Differentiation of Porcine Mesenchymal Stem Cells: Application of NB-hNME1 as a Human NME1 Suppressor

Jin Hyung Cho <sup>1,4,†</sup>, Won Seok Ju <sup>1,5,†</sup>, Sang Young Seo <sup>1</sup>, Bo Hyun Kim <sup>2</sup>, Ji-Su Kim <sup>3</sup>, Jong-Geol Kim <sup>1</sup>, Soon Ju Park <sup>1</sup> and Young-Kug Choo <sup>1,5,\*</sup>

## Supplementary Information

\*\*\*The supplementary information includes following information\*\*\*

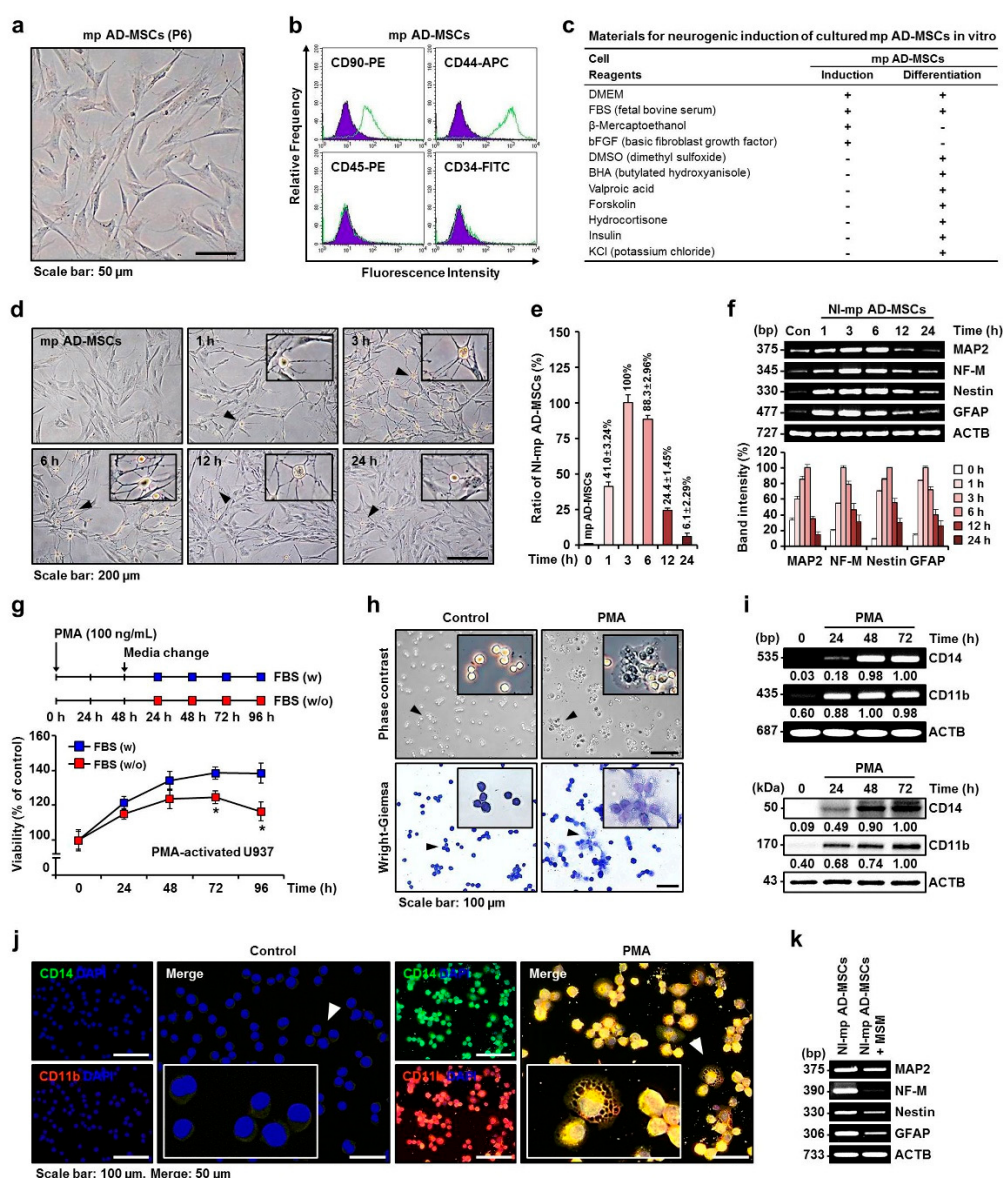

**Figure S1.** miniature pig adipose tissue-derived mesenchymal stem cells (mp AD-MSCs) and U937 cells. **(a)** Phase-contrast images of mp AD-MSCs in culture (P6, passage 6). Only cells with less than 6 passages were used in this experiment. **(b)** Flow cytometry for surface markers of porcine MSCs. Cell surface analysis of mp AD-MSCs by fluorescence-activated cell sorting (FACS) revealed that mp AD-MSCs were positive for CD90 and CD44 but negative for CD45 and CD34. Positive values are > 90%; negatives are < 5%. Purple indicates the immunoglobulin isotype control; green indicates specific antibody staining profiles. **(c)** Components of cell culture media for both neuronal induction and differentiation of mp AD-MSCs in vitro. **(d)** Time-dependent morphological representation of mp AD-MSC differentiation at 1, 3, 6, 12, and 24 h. Arrowheads indicate enlarged images. **(e)** Variations in the cell count of NI-mp AD-MSCs were quantified at 1, 3, 6, 12, and 24 h. Data are presented as mean percentage levels  $\pm$  SD ( $n = 3$ ). **(f)** RT-PCR results confirmed the expression patterns of MAP2, NF-M, nestin, and GFAP in NI-mp AD-MSCs.  $\beta$ -Actin (ACTB) was used as a loading control (upper panel). Quantification of relative band intensity (lower panel) and data are presented as mean percentage levels  $\pm$  SD ( $n = 3$ ). **(g)** The phorbol 12-myristate 13-acetate (PMA)-activated macrophages (MPs) were cultured in serum-free or serum-containing media, and cell proliferation was quantified by an MTS assay at 24, 48, 72, and 96 h. MPs and MSM were used within 48 h with no significant reduction in cell growth rates. Data are presented as mean percentage levels  $\pm$  SD ( $n = 3$ ;  $*P < 0.05$ ). **(h)** Phase-contrast images and Wright-Giemsa staining of monocytes and PMA-activated MPs. Arrowheads indicate enlarged images. **(i)** RT-PCR (upper panel) and western blot (lower panel) results confirmed the expression patterns of the CD14 and CD11b cluster in time-dependent manner. ACTB was used as a loading control. **(j)** Immunocytochemistry results showed expression patterns of CD14 and CD11b in monocytes or PMA-activated MPs. Arrowheads indicate enlarged merged images. **(k)** RT-PCR results confirmed the expression patterns of MAP2, NF-M, nestin, and GFAP in NI-mp AD-MSCs or co-cultures with MSM. ACTB was used as a loading control.

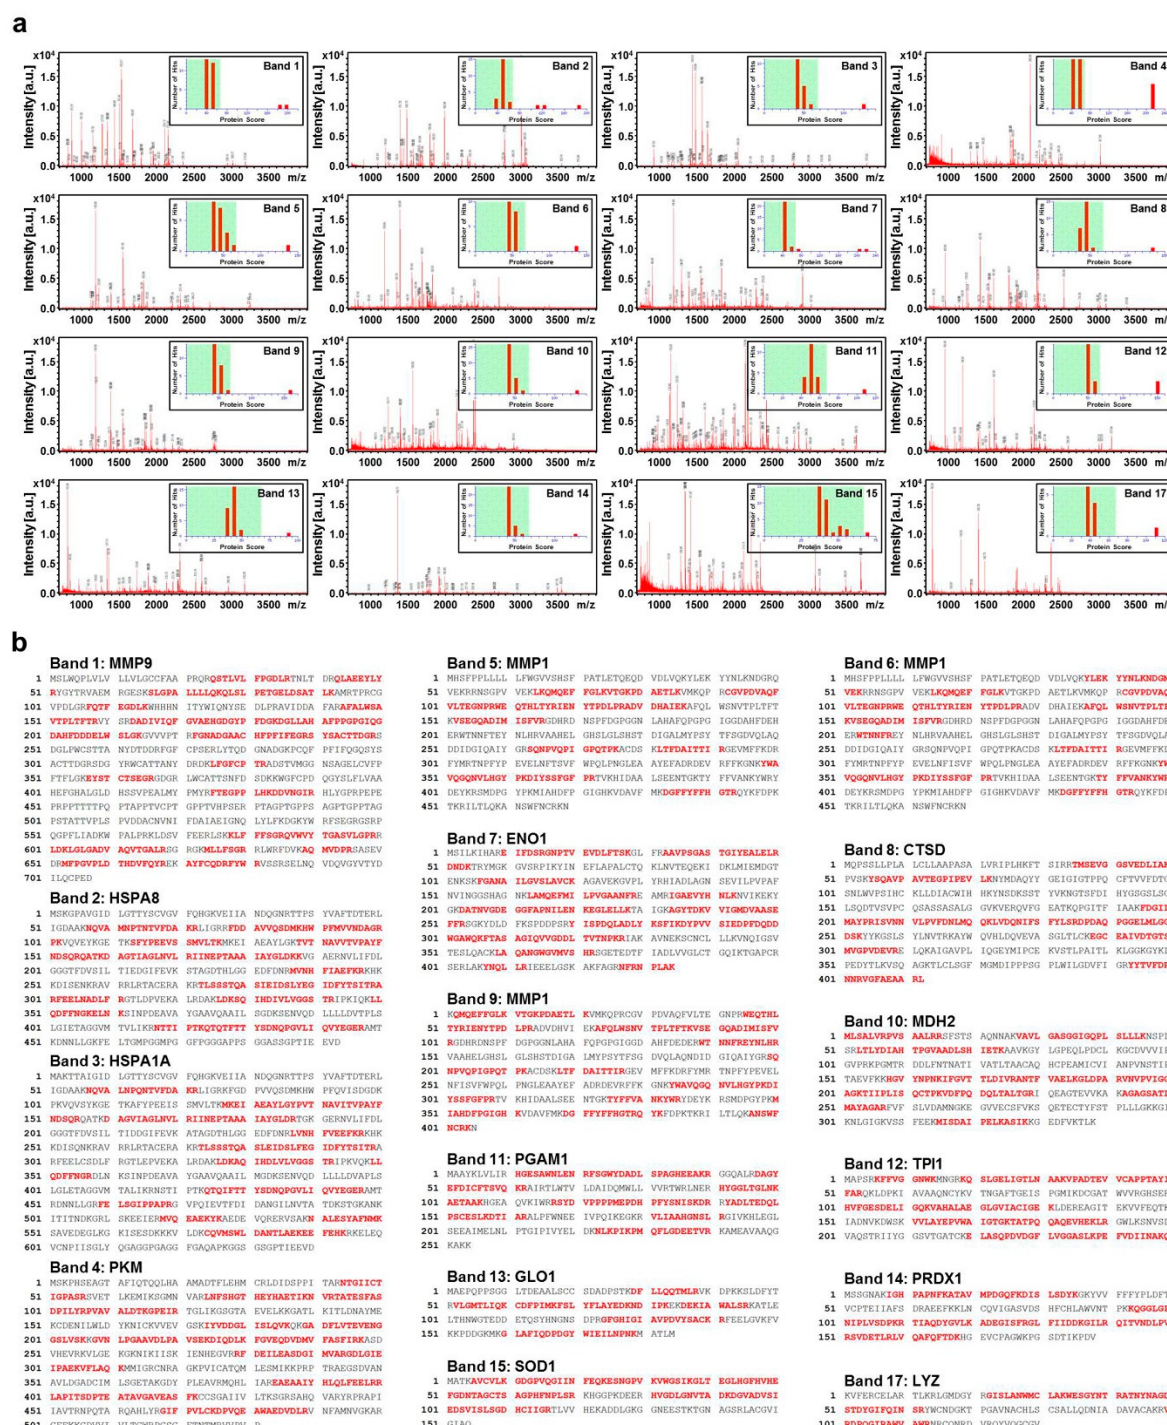

**Figure S2.** PMF spectrum of MSM containing 17 proteins identified by NCBI Protein database searches using peptide sequences from MS/MS. **(a)** Spectral mass (in mass per charge unit,  $m/z$ ) obtained by MALDI-TOF MS were analyzed by bioinformatics using the Mascot and Profound search engines. The x-axis represents the mass-to-charge ratio ( $m/z$ ), and the y-axis represents the relative abundance. **(b)** The probability-based Mowse scores were obtained using the Mascot search engine. Among predicted proteins with differential Mowse scores shown as multiple bars on the x-axis, only those with significant Mowse scores are shown ( $P < 0.05$ ). Red marks indicate peptides identified by mass fingerprinting that match calculated molecular weights.

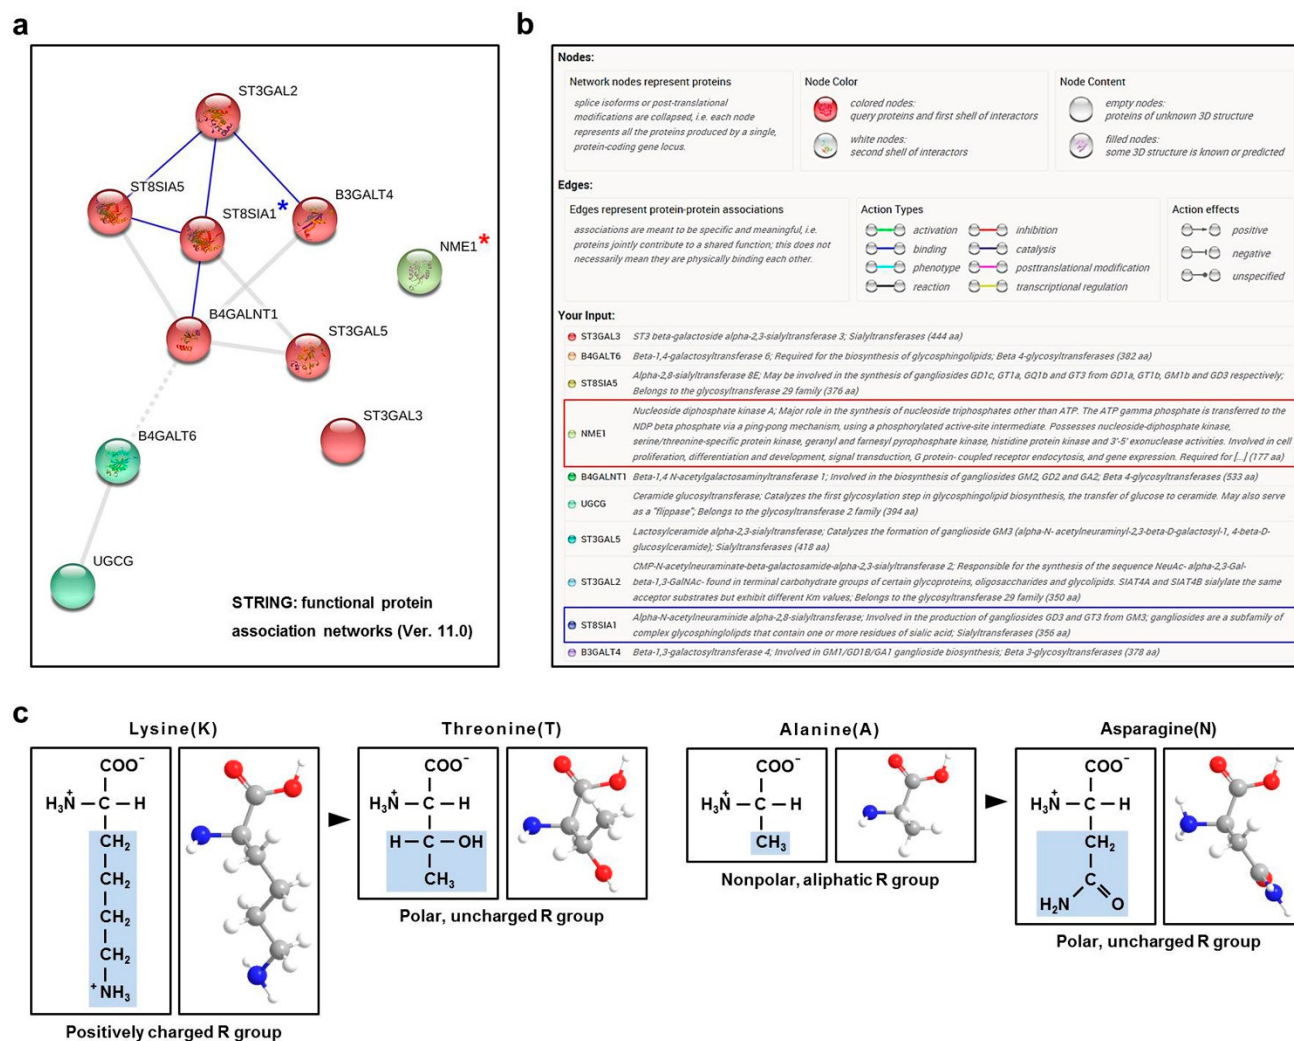

**Figure S3.** The Protein-protein interaction network for genes and signal analysis legend. **(a)** The protein-protein interaction network for the differentially expressed genes. The lines represent the strength of predicted functional interactions between proteins. The interaction of ST8SIA1 (blue asterisk) and NME1 (red asterisk) proteins was schematized through the STRING database; the interaction of ST8SIA1 and NME1 proteins has not yet been reported. STRING, Search tool for the retrieval of interacting genes/proteins. **(b)** Signal analysis legend. Nodes represent genes; edges represent the corresponding protein-protein interaction pairs. In total, 10 genes were integrated into the network. **(c)** Structural formulas of lysine (K), threonine (T), alanine (A), and asparagine (N).

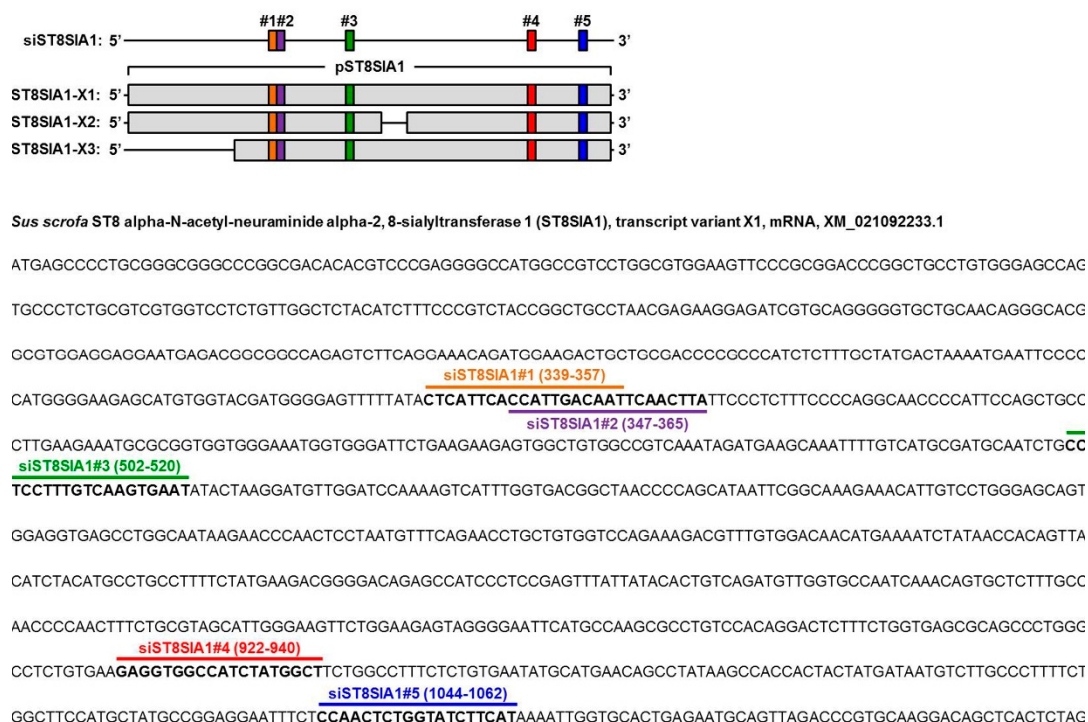

**Figure S4.** The siRNA information of ST8SIA1. (a) The schematic structure of siST8SIA1 and silencing locations on the three ST8SIA1 genes. (b) Five siRNA targets were selected in the ST8SIA1 mRNA sequence.

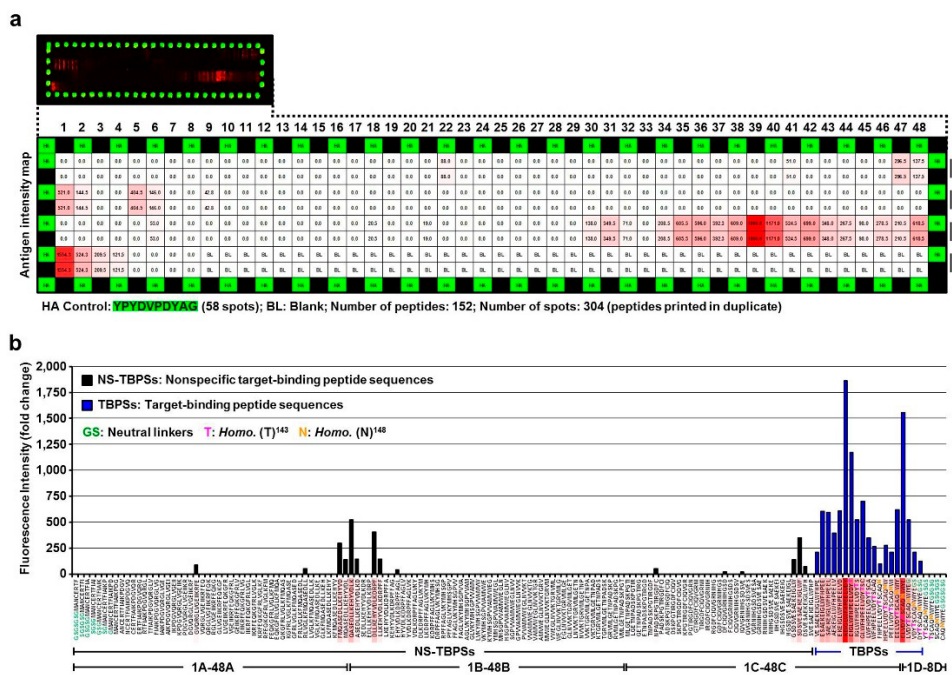

**Figure S5.** Antigen intensity map and fluorescence intensity of the peptide array signals. (a) Antigen intensity map of hNME1 and (b) fluorescence intensity of the peptide array signals. Two of Table 143. (T<sup>143</sup>) and asparagine 148 (N<sup>148</sup>) in the hNME1 and pNME1 sequence.

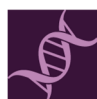

**Table S1.** Primer sequences used to generate templates for RT-PCR.

| Gene   | Description                            | Species             | Primer (5'→3')                                                    | Reaction condition                                                                                         | Size (bp) |
|--------|----------------------------------------|---------------------|-------------------------------------------------------------------|------------------------------------------------------------------------------------------------------------|-----------|
| MAP2   | Microtubule-associated protein 2       | <i>Sus scrofa</i>   | F: AAG AGA AAG GGG CAA CGC A<br>R: TGG CAC TCT TTT CGC TTG GT     | Denaturation: 30 s at 95 °C<br>Annealing: 30 s at 62 °C<br>Extension: 30 s at 72 °C<br>Reaction cycles: 35 | 375       |
| NF-M   | Neurofilament medium                   | <i>Sus scrofa</i>   | F: ATA CAC ACC GAC AGC CCT CC<br>R: CCT CTT CGG CTT GGT CTG ATT   |                                                                                                            | 390       |
| Nestin | Nestin                                 | <i>Sus scrofa</i>   | F: GGG TGC AAC GAG AAC TGG AT<br>R: ACA CGG GCT CTA TCA CCT CT    |                                                                                                            | 330       |
| GFAP   | Glial fibrillary acidic protein        | <i>Sus scrofa</i>   | F: TCG ACC AAC TCA CCG CCA A<br>R: GCT TGG TCA CGT CCA TTT CCA    |                                                                                                            | 306       |
| ACTB   | β-Actin                                | <i>Sus scrofa</i>   | F: CGC AAG TAC TCC GTG TGG AT<br>R: CAG GGC TTA CCT GTA CAC TGA C |                                                                                                            | 727       |
| CD14   | Cluster of differentiation molecule 14 | <i>Homo sapiens</i> | F: GCT GGA CGA TGA AGA TTT CC<br>R: ATT GTC AGA CAG GTC TAG GC    | Denaturation: 30 s at 95 °C<br>Annealing: 30 s at 58 °C<br>Extension: 60 s at 72 °C<br>Reaction cycles: 35 | 535       |
| CD11b  | Integrin alpha M                       | <i>Homo sapiens</i> | F: GGT GGC AGT GTG ATG CTG TT<br>R: CCT TGC CTT TCA CCA CCT GA    |                                                                                                            | 435       |
| ACTB   | β-Actin                                | <i>Homo sapiens</i> | F: CGC AAG TAC TCC GTG TGG AT<br>R: CAG GGC TTA CCT GTA CAC TGA C |                                                                                                            | 687       |
| NME1   | Nucleoside diphosphate kinase A        | <i>Homo sapiens</i> | F: GCC GGA GTT CAA ACC TAA G<br>R: GGA AGG AGG GGA AAT GGA TG     | Denaturation: 30 s at 95 °C<br>Annealing: 30 s at 56 °C<br>Extension: 60 s at 72 °C<br>Reaction cycles: 35 | 543       |
| NME2   | Nucleoside diphosphate kinase B        | <i>Homo sapiens</i> | F: CAC CTT CAT CGC CAT CAA G<br>R: AGA ATG ATC AAT CCT GTT GCC    |                                                                                                            | 541       |
| NME1/2 | Nucleoside diphosphate kinase A/B      | <i>Homo sapiens</i> | F: GCC GGA GTT CAA ACC TAA G<br>R: AGA ATG ATC AAT CCT GTT GCC    |                                                                                                            | 937       |

**Table S2.** Identification of secretomes by MALDI-TOF MS in PMA-induced human MPs.

| No. <sup>a</sup> | Gene Name | Accession Number | Description                                      | Score | Expect  | M <sub>r</sub> <sup>b</sup> | pI <sup>c</sup> |
|------------------|-----------|------------------|--------------------------------------------------|-------|---------|-----------------------------|-----------------|
| 1                | MMP9      | NP_004985.2      | Matrix metalloproteinase-9 preproprotein         | 198   | 5e-15   | 78408                       | 5.69            |
| 2                | HSPA8     | NP_694881.1      | Heat shock cognate 71 kDa protein isoform 2      | 186   | 7.9e-14 | 53484                       | 5.62            |
| 3                | HSPA1A    | CAA82315.1       | Heat shock 70 kDa protein 1                      | 106   | 0.0032  | 69947                       | 5.55            |
| 4                | PKM       | AAH35198.1       | Pyruvate kinase, muscle                          | 214   | 1.3e-16 | 57942                       | 7.96            |
| 5                | MMP1      | AAV38949.1       | Matrix metalloproteinase 1                       | 137   | 6.3e-09 | 53928                       | 6.50            |
| 6                | MMP1      | BAD96776.1       | Matrix metalloproteinase 1                       | 136   | 7.9e-09 | 53948                       | 6.36            |
| 7                | ENO1      | NP_001340275.1   | Alpha-enolase isoform 3                          | 201   | 2.5e-15 | 47297                       | 6.57            |
| 8                | CTSD      | NP_001900.1      | Cathepsin D preproprotein                        | 80    | 0.0033  | 44524                       | 8.92            |
| 9                | MMP1      | BAD96755.1       | Matrix metalloproteinase 1 preproprotein variant | 149   | 4e-10   | 53901                       | 6.67            |
| 10               | MDH2      | CAG38785.1       | Malate dehydrogenase 2                           | 128   | 5e-08   | 35537                       | 8.92            |
| 11               | PGAM1     | AAH62302.1       | Phosphoglycerate mutase 1                        | 108   | 5e-06   | 28802                       | 6.67            |
| 12               | TPI1      | BAD96358.1       | Triosephosphate isomerase 1 variant              | 150   | 3.1e-10 | 26696                       | 6.90            |
| 13               | GLO1      | NP_006699.2      | Lactoylglutathione lyase                         | 92    | 0.0002  | 20764                       | 5.12            |
| 14               | PRDX1     | EAX06977.1       | Peroxiredoxin 1, isoform CRA_b                   | 126   | 7.9e-08 | 20715                       | 6.41            |
| 15               | SOD1      | NP_000445.1      | Superoxide dismutase                             | 69    | 0.036   | 15926                       | 5.70            |
| 16               | NME1      | NP_937818.1      | Nucleoside diphosphate kinase A                  | 142   | 2.1e-09 | 19641                       | 5.42            |
| 17               | LYZ       | 1LZS_A           | Lysozyme                                         | 111   | 2.5e-06 | 14691                       | 9.28            |

<sup>a</sup>Gel band number; <sup>b</sup>Monoisotopic mass; <sup>c</sup>Isoelectric point.

**Table S3.** Information of siRNA sequences for pST8SIA1 gene silencing.

| No. | siRNA      | Sense (5'→3')             | Antisense (5'→3')         | Position <sup>a</sup> |
|-----|------------|---------------------------|---------------------------|-----------------------|
| 1   | ST8SIA1 #1 | CUCAUUCACCAUUGACAAUUU     | AUUGUCA AUGGUGAAUGAGUU    | 339-357               |
| 2   | ST8SIA1 #2 | CCAUUGACAAUUAACUUAUU      | UAAGUUGAAUUGUCA AUGGUU    | 347-365               |
| 3   | ST8SIA1 #3 | CCUCCUUUGUCAAGUGAAUUU     | AUUCACUUGACAAAGGAGGUU     | 502-520               |
| 4   | ST8SIA1 #4 | GAGGUGGCCAUCUAUGGCUUU     | AGCCAUAGAUGGCCACCUCUU     | 922-940               |
| 5   | ST8SIA1 #5 | CCAACUCUGGUAUCUUAUUU      | AUGAAGAUACCAGAGUUGGUU     | 1044-1062             |
| 6   | Scramble   | CCUCGUGCCGUUCCAUCAGGUAGUU | CUACCUGAUGGAACGGCACGAGGUU |                       |

All siRNAs were synthesized with 3'-UU overhangs. <sup>a</sup>The position refers to the siRNA sequence position on the target gene.
